# Supplementary material for: HuNAC20 and HuNAC25, Two Novel NAC Genes from Pitaya, Confer Cold Tolerance in Transgenic Arabidopsis
Source: MDPI journal article supplement (doi:10.3390/ijms23042189), 2022-02-16
Supplement: s1 [file s1]

**Table S1 All *HuNAC* genes identified from the pitaya genome**

| <b>Chromosome</b> | <b>Rename</b>  | <b>Gene ID</b> | <b>Protein<br/>length (aa)</b> | <b>Molecular<br/>weight (kDa)</b> | <b>Theoretical<br/>PI</b> | <b>Hydrophilicity<br/>index</b> |
|-------------------|----------------|----------------|--------------------------------|-----------------------------------|---------------------------|---------------------------------|
| Chromosome 1      | <i>HuNAC1</i>  | HU01G00060.1   | 353                            | 40.16                             | 5.11                      | -0.724                          |
|                   | <i>HuNAC2</i>  | HU01G00420.1   | 306                            | 35.05                             | 8.71                      | -0.656                          |
|                   | <i>HuNAC3</i>  | HU01G01336.1   | 279                            | 30.95                             | 8.65                      | -0.525                          |
|                   | <i>HuNAC4</i>  | HU01G01551.1   | 214                            | 24.80                             | 9.25                      | -0.848                          |
|                   | <i>HuNAC5</i>  | HU01G01910.1   | 355                            | 39.45                             | 9.06                      | -0.694                          |
|                   | <i>HuNAC6</i>  | HU01G01912.1   | 191                            | 22.00                             | 9.56                      | -0.613                          |
|                   | <i>HuNAC7</i>  | HU01G02030.1   | 315                            | 36.03                             | 6.37                      | -0.796                          |
|                   | <i>HuNAC8</i>  | HU01G02105.1   | 323                            | 36.44                             | 6.33                      | -0.611                          |
|                   | <i>HuNAC9</i>  | HU01G02216.1   | 244                            | 28.07                             | 6.67                      | -0.798                          |
|                   | <i>HuNAC10</i> | HU01G02747.1   | 155                            | 18.12                             | 9.73                      | -0.652                          |
| Chromosome 2      | <i>HuNAC11</i> | HU02G00016.1   | 270                            | 30.33                             | 7.60                      | -0.784                          |
|                   | <i>HuNAC12</i> | HU02G00325.1   | 417                            | 47.10                             | 5.41                      | -0.611                          |
|                   | <i>HuNAC13</i> | HU02G00350.1   | 285                            | 32.94                             | 8.90                      | -0.847                          |
|                   | <i>HuNAC14</i> | HU02G01957.1   | 174                            | 20.63                             | 8.35                      | -0.656                          |
|                   | <i>HuNAC15</i> | HU02G03060.1   | 344                            | 38.24                             | 8.66                      | -0.670                          |
| Chromosome 3      | <i>HuNAC16</i> | HU03G00363.1   | 300                            | 34.23                             | 5.42                      | -0.688                          |
|                   | <i>HuNAC17</i> | HU03G00832.1   | 571                            | 63.93                             | 4.82                      | -0.496                          |
|                   | <i>HuNAC18</i> | HU03G00963.1   | 243                            | 27.71                             | 5.46                      | -0.696                          |
|                   | <i>HuNAC19</i> | HU03G00965.1   | 612                            | 69.35                             | 5.44                      | -0.629                          |
|                   | <i>HuNAC20</i> | HU03G01381.1   | 296                            | 33.74                             | 7.69                      | -0.717                          |
|                   | <i>HuNAC21</i> | HU03G01415.1   | 305                            | 34.57                             | 4.78                      | -0.490                          |
|                   | <i>HuNAC22</i> | HU03G01419.1   | 339                            | 38.30                             | 4.90                      | -0.592                          |
|                   | <i>HuNAC23</i> | HU03G02275.1   | 338                            | 38.46                             | 6.85                      | -0.921                          |
| Chromosome 4      | <i>HuNAC24</i> | HU04G00486.1   | 322                            | 36.66                             | 5.57                      | -0.684                          |
|                   | <i>HuNAC25</i> | HU04G01001.1   | 296                            | 33.65                             | 6.26                      | -0.692                          |

|              |                |              |     |       |      |        |
|--------------|----------------|--------------|-----|-------|------|--------|
|              | <i>HuNAC26</i> | HU04G01141.1 | 332 | 37.76 | 8.84 | -0.717 |
|              | <i>HuNAC27</i> | HU04G01162.1 | 315 | 35.26 | 7.55 | -0.659 |
|              | <i>HuNAC28</i> | HU04G01575.1 | 363 | 40.04 | 6.08 | -0.553 |
|              | <i>HuNAC29</i> | HU04G01653.1 | 656 | 72.34 | 5.07 | -0.620 |
|              | <i>HuNAC30</i> | HU04G01686.1 | 684 | 75.87 | 5.33 | -0.557 |
|              | <i>HuNAC31</i> | HU04G01838.1 | 296 | 33.65 | 6.26 | -0.692 |
| Chromosome 5 | <i>HuNAC32</i> | HU05G00302.1 | 329 | 37.15 | 5.71 | -0.624 |
|              | <i>HuNAC33</i> | HU05G00497.1 | 368 | 42.23 | 6.59 | -0.837 |
|              | <i>HuNAC34</i> | HU05G00603.1 | 344 | 37.76 | 8.11 | -0.492 |
|              | <i>HuNAC35</i> | HU05G00958.1 | 494 | 55.25 | 6.73 | -0.877 |
|              | <i>HuNAC36</i> | HU05G01179.1 | 312 | 35.49 | 5.86 | -0.610 |
|              | <i>HuNAC37</i> | HU05G01191.1 | 391 | 43.96 | 8.54 | -0.500 |
|              | <i>HuNAC38</i> | HU05G02103.1 | 366 | 41.73 | 5.27 | -0.793 |
| Chromosome 6 | <i>HuNAC39</i> | HU06G00112.1 | 375 | 42.70 | 5.36 | -0.783 |
|              | <i>HuNAC40</i> | HU06G01181.1 | 325 | 36.93 | 5.42 | -0.624 |
|              | <i>HuNAC41</i> | HU06G01682.1 | 454 | 51.25 | 8.90 | -0.627 |
| Chromosome 7 | <i>HuNAC42</i> | HU07G00181.1 | 353 | 40.07 | 6.39 | -0.682 |
|              | <i>HuNAC43</i> | HU07G00186.1 | 350 | 39.81 | 6.39 | -0.704 |
|              | <i>HuNAC44</i> | HU07G00263.1 | 319 | 36.96 | 5.38 | -0.897 |
|              | <i>HuNAC45</i> | HU07G00854.1 | 302 | 34.53 | 6.76 | -0.663 |
|              | <i>HuNAC46</i> | HU07G02058.1 | 282 | 31.46 | 7.08 | -0.565 |
| Chromosome 8 | <i>HuNAC47</i> | HU08G00445.1 | 361 | 40.18 | 9.13 | -0.618 |
|              | <i>HuNAC48</i> | HU08G00521.1 | 344 | 37.76 | 8.11 | -0.492 |
|              | <i>HuNAC49</i> | HU08G00888.1 | 403 | 45.02 | 5.66 | -0.691 |
|              | <i>HuNAC50</i> | HU08G01013.1 | 244 | 27.78 | 5.43 | -0.725 |
|              | <i>HuNAC51</i> | HU08G01016.1 | 573 | 64.65 | 5.43 | -0.725 |
|              | <i>HuNAC52</i> | HU08G01430.1 | 341 | 37.86 | 5.08 | -0.540 |
|              | <i>HuNAC53</i> | HU08G02126.1 | 327 | 36.25 | 8.94 | -0.588 |

|               |                |              |     |       |      |        |
|---------------|----------------|--------------|-----|-------|------|--------|
|               | <i>HuNAC54</i> | HU08G02135.1 | 327 | 36.25 | 8.94 | -0.588 |
| Chromosome 9  | <i>HuNAC55</i> | HU09G00056.1 | 154 | 17.95 | 9.19 | -0.553 |
|               | <i>HuNAC56</i> | HU09G00230.1 | 393 | 44.19 | 6.81 | -0.566 |
|               | <i>HuNAC57</i> | HU09G00238.1 | 289 | 32.24 | 5.89 | -0.716 |
|               | <i>HuNAC58</i> | HU09G01575.1 | 328 | 36.17 | 8.89 | -0.716 |
| Chromosome 10 | <i>HuNAC59</i> | HU10G00023.1 | 272 | 30.34 | 8.37 | -0.656 |
|               | <i>HuNAC60</i> | HU10G00380.1 | 281 | 32.34 | 8.54 | -0.741 |
|               | <i>HuNAC61</i> | HU10G01741.1 | 347 | 38.70 | 8.36 | -0.627 |
| Chromosome 11 | <i>HuNAC62</i> | HU11G01180.1 | 299 | 34.19 | 6.67 | -0.723 |
|               | <i>HuNAC63</i> | HU11G01542.1 | 331 | 38.33 | 5.95 | -0.798 |
|               | <i>HuNAC64</i> | HU11G01605.1 | 377 | 42.84 | 5.67 | -0.753 |
