# Supplementary material for: HuNAC20 and HuNAC25, Two Novel NAC Genes from Pitaya, Confer Cold Tolerance in Transgenic Arabidopsis
Source: MDPI journal article supplement (doi:10.3390/ijms23042189), 2022-02-16
Supplement: s1 [file s1]

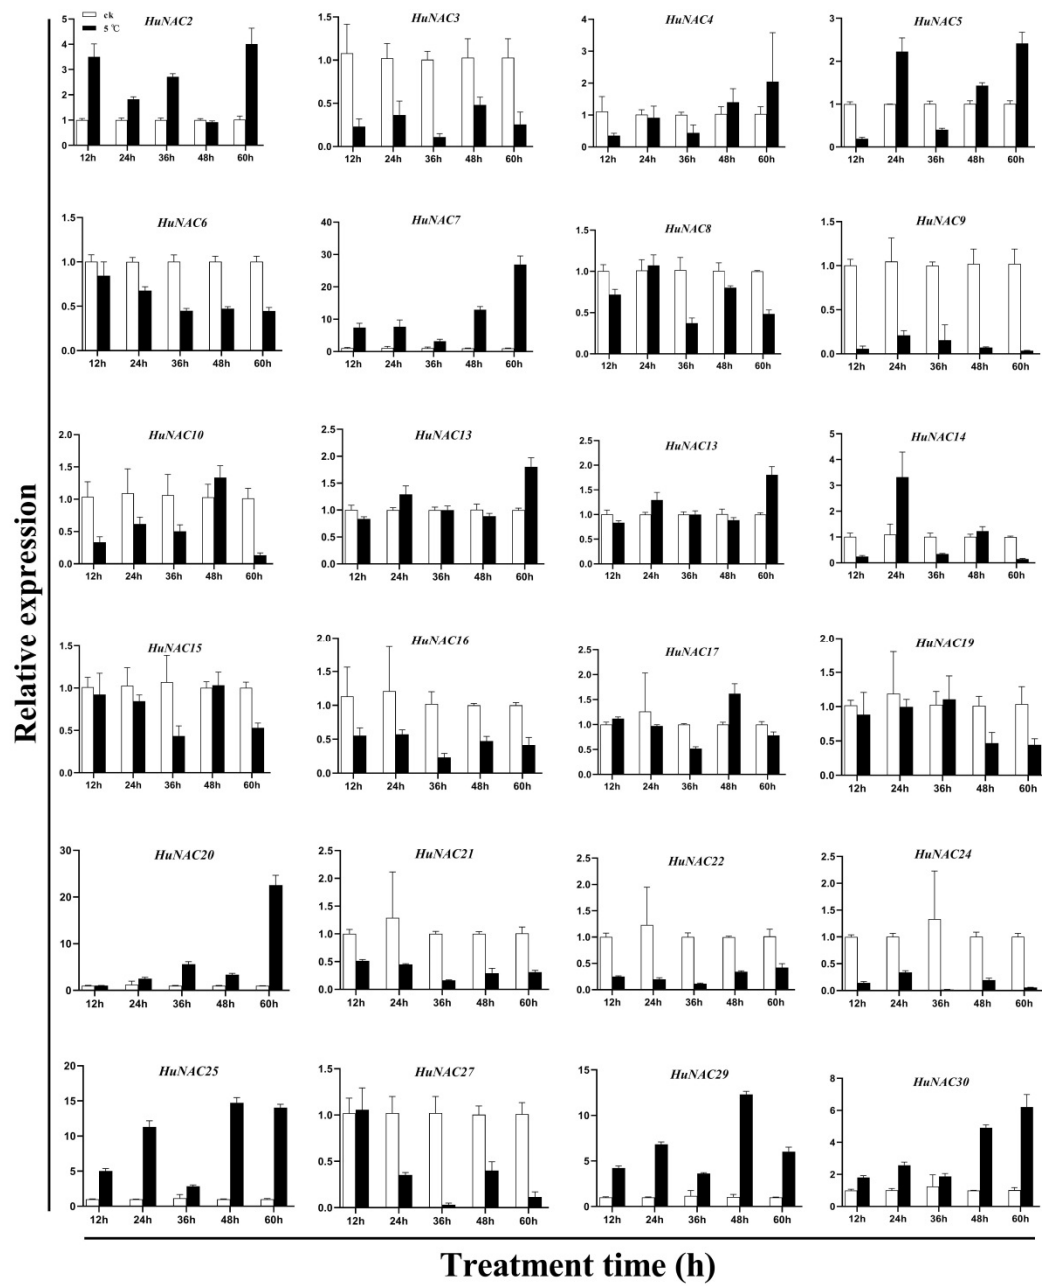

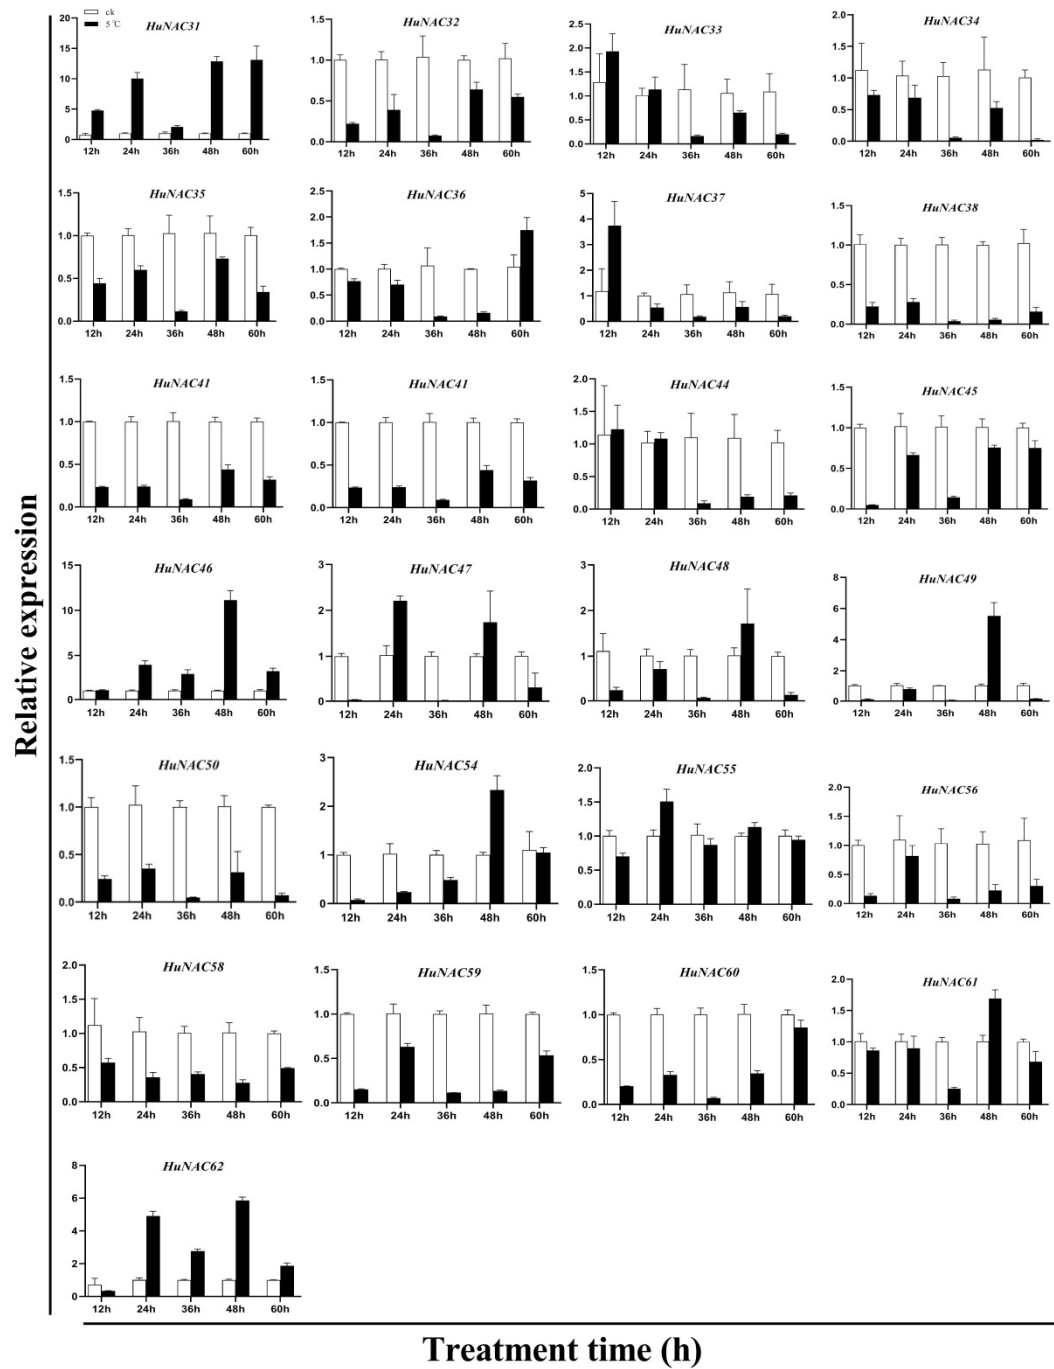

**Figure S2. Expression patterns of 64 *HuNAC* genes under cold stress treatments.** Three biological replicates were used and bars represent the relative expression of different genes under cold stress.

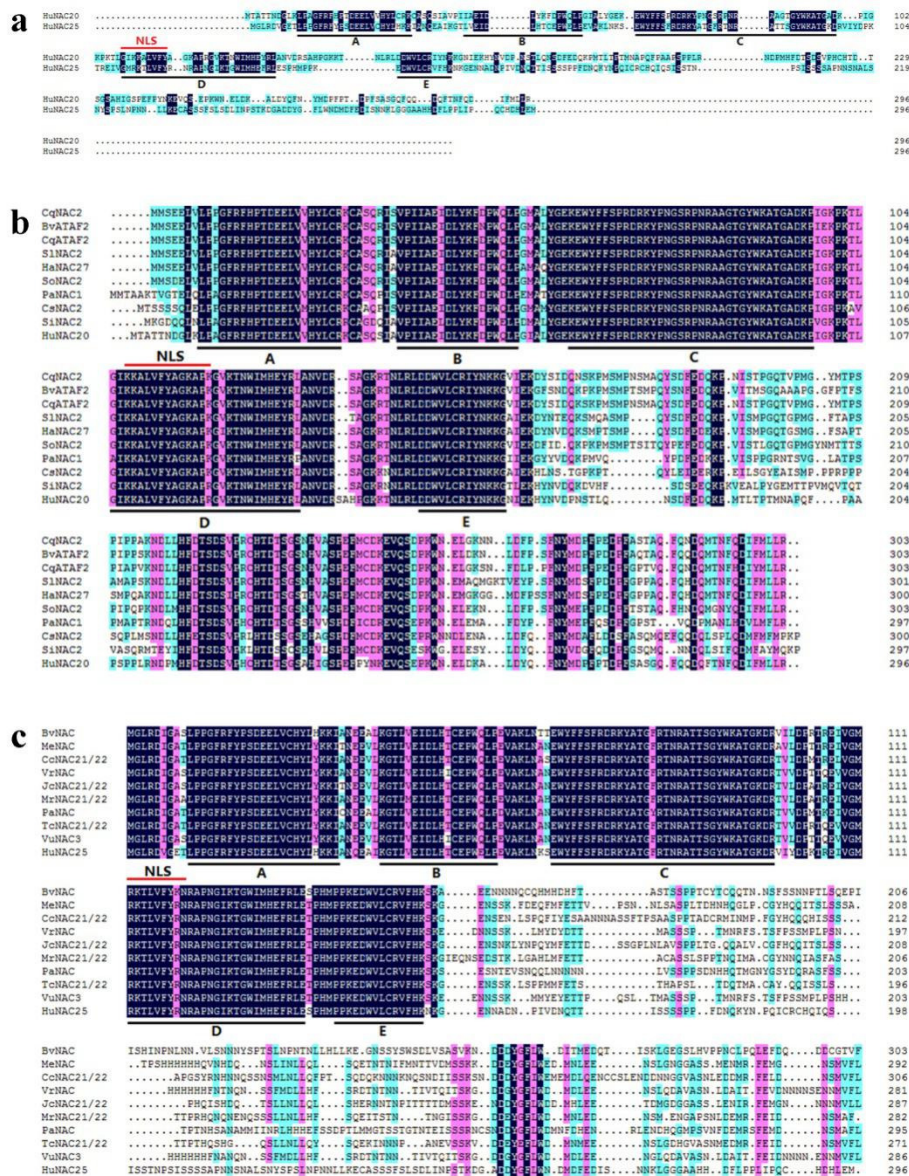

**Figure S3. Multiple alignments of HuNAC20 and HuNAC25 proteins and other plant NAC proteins.** The accession numbers are as follows: CqNAC2 (*Chenopodium quinoa*, XP\_021772603.1), BvATAF2 (*Beta vulgaris*, QGZ00533.1), CqATAF2 (*Chenopodium quinoa*, XP\_021734633.1), SiNAC2 (*Suaeda liaotungensis*, AGZ15313.1), HaNAC27 (*Haloxylon ammodendron*, AOC59210.1), SoNAC2 (*Spinacia oleracea*, XP\_021863783.1), PaNAC1 (*Phytolacca acinosa*, ADQ00628.1), CsNAC2 (*Camellia sinensis*, XP\_028092030.1), SiNAC2 (*Sesamum indicum*, XP\_011099683.1), BvNAC (*Beta vulgaris*, XP\_010679326.1), MeNAC (*Manihot esculenta*, XP\_021630142.1), CcNAC21/22 (*Citrus clementine*, XP\_006443820.1), VrNAC (*Vigna radiata* var. *radiata*, XP\_014495173.1), JcNAC21/22 (*Jatropha curcas*, XP\_012085297.1), MrNAC21/22 (*Morella rubra*, KAB1223758.1), PaNAC (*Parasponia andersonii*, PON62646.1), TcNAC21/22 (*Theobroma*

*cacao*, XP\_007050267.1), VuNAC3 (*Vigna unguiculata*, XP\_027920779.1)
